# Supplementary material for: Factors Associated with the Intention of Registered Dietitians to Discuss Nutrigenetics with their Patients/Clients
Source: Atypon-hosted journal article supplement (doi:10.3148/cjdpr-2016-005), 2016-05-16
Supplement: cjdpr-2016-005suppl.pdf.pdf [file cjdpr-2016-005suppl.pdf.pdf]

### **Supplementary Table 1. Study Questionnaire.**

1. J'accepte librement de participer à cette étude.

(1) Oui (2) Non

2. Quel est votre sexe?

(1) Femme

(2) Homme

3. À quel groupe d'âge appartenez-vous?

(1) 25 ans et moins

(2) 26 à 30 ans

(3) 31 à 40 ans

(4) 41 à 50 ans

(5) 50 ans et plus

4. Dans quelle région exercez-vous votre profession de diététiste?

(1) Bas-Saint-Laurent

(2) Saguenay-Lac-St-Jean

(3) Capitale-Nationale (Québec)

(4) Mauricie

(5) Estrie

(6) Montréal

(7) Outaouais

(8) Abitibi-Témiscamingue

(9) Côte-Nord

(10) Nord-du-Québec

(11) Gaspésie-Iles-de-la-Madeleine

(12) Chaudière-Appalaches

(13) Laval

(14) Lanaudière

- (15) Laurentides
- (16) Montérégie
- (17) Centre-du-Québec

Autre (veuillez préciser)

-----

**Prenez le temps de lire les quelques définitions suivantes avant de poursuivre le questionnaire.**

La **génomique nutritionnelle** est l'étude de la relation entre le génome, la nutrition et leurs effets sur la santé. Cette science peut être divisée en deux disciplines : la **nutrigénomique** et la **nutrigénétique**. Les termes génomique nutritionnelle et nutrigénomique sont parfois employés comme étant des synonymes. Dans ces cas, le terme **nutrigénomique** englobe alors la **nutrigénétique**.

La **nutrigénomique** est l'étude de l'effet des composés alimentaires sur le génome (expression génique), mais également sur toutes les fonctions biologiques (métabolome et protéome) résultant en des changements physiologiques.

La **nutrigénétique** étudie comment le profil génétique (variations génétiques) peut influencer la réponse d'une personne ou de groupes de personnes à l'alimentation.

*Cochez dans la case appropriée votre choix de réponse.*

5. Avec les ressources dont je dispose, **je me sens capable** de discuter de nutriginétique avec mes patients/clients.

- (1) Totalement en désaccord
- (2) En désaccord
- (3) Ni en accord ni en désaccord
- (4) En accord
- (5) Totalement en accord

6. Discuter de nutriginétique avec mes patients/clients durant mes consultations nutritionnelles est, pour le patient/client :

- (1) Très délétère
- (2) Délétère
- (3) Ni l'un ni l'autre
- (4) Bénéfique
- (5) Très bénéfique

7. Si je disposais de **suffisamment de connaissances/formations**, je pourrais discuter de nutriginétique avec mon patient/client.

- (1) Très improbable
- (2) Improbable
- (3) Ni l'un ni l'autre
- (4) Probable
- (5) Très probable

8. Les **personnes importantes pour moi** pensent que c'est correct que je parle de nutriginétique avec mes patients/clients.

- (1) Totalement en désaccord
- (2) En désaccord
- (3) Ni en accord ni en désaccord
- (4) En accord
- (5) Totalement en accord

9. Si cela **intéressait mon patient/client**, je pourrais discuter de nutriginétique avec ce dernier.

- (1) Très improbable
- (2) Improbable
- (3) Ni l'un ni l'autre
- (4) Probable
- (5) Très probable

10. **Je prévois** discuter de nutriginétique avec mes patients/clients.

- (1) Totalement en désaccord
- (2) En désaccord
- (3) Ni en accord ni en désaccord
- (4) En accord
- (5) Totalement en accord

11. Les **chercheurs/scientifiques** approuveraient/désapprouveraient que je discute de nutriginétique avec mes patients/clients.

- (1) Désapprouveraient fortement
- (2) Désapprouveraient
- (3) Ni l'un ni l'autre
- (4) Approuveraient
- (5) Approuveraient fortement

*Répondez par oui (1) ou non (2) à la question suivante.*

12. Dans les trois derniers mois, j'ai discuté de nutriginétique avec mes patients/clients.

- (1) Oui (2) Non

*Cochez dans la case appropriée votre choix de réponse.*

13. Si je disposais d'**outils cliniques** sur la nutriginétique, cela me permettrait de discuter de ce sujet avec mon patient/client.

- (1) Très improbable
- (2) Improbable
- (3) Ni l'un ni l'autre
- (4) Probable
- (5) Très probable

14. **La plupart des personnes importantes** pour moi croient que je devrais discuter de nutriginétique avec mes patients/clients.

- (1) Totalement en désaccord
- (2) En désaccord
- (3) Ni en accord ni en désaccord
- (4) En accord
- (5) Totalement en accord

15. Si je le voulais, **je pourrais facilement** discuter de nutriginétique avec mes patients/clients durant mes consultations nutritionnelles?

- (1) Totalement en désaccord
- (2) En désaccord
- (3) Ni en accord ni en désaccord
- (4) En accord
- (5) Totalement en accord

16. Les **autres diététistes membres de l'OPDQ** approuveraient/désapprouveraient que je discute de nutriginétique avec mes patients/clients.

- (1) Désapprouveraient fortement
- (2) Désapprouveraient
- (3) Ni l'un ni l'autre
- (4) Approuveraient
- (5) Approuveraient fortement

17. **J'ai l'intention** de discuter de nutriginétique avec mes patients/clients.

- (1) Totalement en désaccord
- (2) En désaccord
- (3) Ni en accord ni en désaccord
- (4) En accord
- (5) Totalement en accord

18. Mes **patrons** approuveraient/désapprouveraient que je discute de nutriginétique avec mes patients/clients.

- (1) Désapprouveraient fortement
- (2) Désapprouveraient
- (3) Ni l'un ni l'autre
- (4) Approuveraient
- (5) Approuveraient fortement

*Pour les cinq prochaines questions, cochez dans la case appropriée votre choix de réponse en fonction de l'énoncé suivant :*

**Si je discutais de nutriginétique avec mes patients/clients...**

19. cela serait **compliqué à comprendre** pour mes patients/clients.

- (1) Très improbable
- (2) Improbable
- (3) Ni l'un ni l'autre
- (4) Probable
- (5) Très probable

20. cela me permettrait de personnaliser davantage **les recommandations nutritionnelles**.

- (1) Très improbable
- (2) Improbable
- (3) Ni l'un ni l'autre
- (4) Probable
- (5) Très probable

21. cela améliorerait l'**efficacité de mes interventions nutritionnelles**.

- (1) Très improbable
- (2) Improbable
- (3) Ni l'un ni l'autre
- (4) Probable
- (5) Très probable

22. cela créerait un **sentiment d'impuissance** chez le patient/client.

- (1) Très improbable
- (2) Improbable
- (3) Ni l'un ni l'autre
- (4) Probable
- (5) Très probable

23. cela serait **compliqué à expliquer** à mes patients/clients.

- (1) Très improbable
- (2) Improbable
- (3) Ni l'un ni l'autre
- (4) Probable
- (5) Très probable

*Cochez dans la case appropriée votre choix de réponse.*

24. Même si je le voulais, je **manquerais de temps** durant mes consultations nutritionnelles pour aborder le sujet de la nutriginétique avec mes patients/clients.

- (1) Très improbable
- (2) Improbable
- (3) Ni l'un ni l'autre
- (4) Probable
- (5) Très probable

25. Discuter de nutriginétique avec mes patients/clients durant mes consultations nutritionnelles est/serait :

- (1) Très désagréable
- (2) Désagréable
- (3) Ni l'un ni l'autre
- (4) Agréable
- (5) Très agréable

26. **Je suis confiant(e)** de pouvoir discuter de nutriginétique avec mes patients/clients.

- (1) Totalemment en désaccord
- (2) En désaccord
- (3) Ni en accord ni en désaccord
- (4) En accord
- (5) Totalemment en accord

27. Je ressens une **pression sociale** qui m'encourage à discuter de nutriginétique avec mes patients/clients.

- (1) Totalemment en désaccord
- (2) En désaccord
- (3) Ni en accord ni en désaccord
- (4) En accord
- (5) Totalemment en accord

28. **Plusieurs obstacles hors de mon contrôle** pourraient m'empêcher de discuter de nutriginétique avec mes patients/clients.

- (1) Totalemment en désaccord
- (2) En désaccord
- (3) Ni en accord ni en désaccord
- (4) En accord
- (5) Totalemment en accord



29. Mes **collègues de travail** approuveraient/désapprouveraient que je discute de nutriginétique avec mes patients/clients.

- (1) Désapprouveraient fortement
- (2) Désapprouveraient
- (3) Ni l'un ni l'autre
- (4) Approuveraient
- (5) Approuveraient fortement

30. **Je veux** discuter de nutriginétique avec mes patients/clients.

- (1) Totalement en désaccord
- (2) En désaccord
- (3) Ni en accord ni en désaccord
- (4) En accord
- (5) Totalement en accord

31. Discuter de nutriginétique avec mes patients/clients durant mes consultations nutritionnelles est :

- (1) Très mauvais
- (2) Mauvais
- (3) Ni l'un ni l'autre
- (4) Bon
- (5) Très bon

32. Discuter de nutriginétique avec mes patients/clients durant mes consultations nutritionnelles est :

- (1) Très inutile
- (2) Inutile
- (3) Ni l'un ni l'autre
- (4) Utile
- (5) Très utile

33. Quels facteurs ou circonstances **pourraient vous empêcher** de discuter de nutriginétique avec vos patients/clients?

-----  
-----  
-----

34. Quels facteurs ou circonstances vous **aideraient** à discuter de nutriginétique avec vos patients/clients?

-----  
-----  
-----

35. Combien d'années d'expérience de travail en nutrition comptez-vous?

- (1) Moins de un an
- (2) 1 à 5 ans
- (3) 6 à 10 ans
- (4) 10 à 15 ans
- (5) 16 à 20 ans
- (6) 20 ans et plus

36. Depuis quelle année êtes-vous membre de l'OPDQ?

-----

37. Quel est le niveau d'éducation le plus élevé que vous ayez atteint?

- (1) Baccalauréat en nutrition
- (2) Microprogramme gradué en nutrition
- (3) Maîtrise en nutrition
- (4) Doctorat en nutrition
- (5) Autres études de 2<sup>e</sup> cycle
- (6) Autres études de 3<sup>e</sup> cycle

Autre (veuillez préciser)

-----

38. Quel est votre principal secteur de pratique?

- (1) Nutrition clinique dans le secteur publique
- (2) Nutrition clinique dans le secteur privé
- (3) Gestion des services alimentaires
- (4) Nutrition communautaire
- (5) Enseignement
- (6) Communication-relations publiques-journalisme
- (7) Recherche
- (8) Représentation
- (9) Industrie

Autre (veuillez préciser)

---

39. Avez-vous déjà interprété les résultats d'un test de nutriginétique?

- (1) Oui (2) Non

40. Avez-vous déjà recommandé l'utilisation d'un test de nutriginétique?

- (1) Oui (2) Non

41. Avez-vous déjà été sollicités par les compagnies proposant ces tests afin de les recommander à vos clients/patients ?

- (1) Oui (2) Non

42. Par quels moyens vous tenez-vous à jour en nutrition?

- (1) Lecture d'articles dans des revues scientifiques
- (2) Lecture d'articles dans des revues de vulgarisation
- (3) Participation à des congrès ou colloques
- (4) Participation à des formations continues
- (5) Recherche sur Internet
- (6) Autre (précisez) \_\_\_\_\_
- (7) Aucun

43. Lors de la lecture d'un article scientifique, quel est votre niveau de compréhension des données qui y sont rapportées?

- (1) Très faible
- (2) Faible
- (3) Moyen
- (4) Bon
- (5) Excellent

44. Lors de la lecture d'un article scientifique, quel est votre niveau de confiance envers votre capacité à interpréter adéquatement qui y sont rapportées?

- (1) Très faible
- (2) Faible
- (3) Moyen
- (4) Bon
- (5) Excellent

45. Combien de patients/clients rencontrez-vous approximativement par semaine?

- (1) Moins de 5
- (2) 6 à 10
- (3) 11 à 20
- (4) 21 à 30
- (5) Plus de 30

46. Avez-vous déjà suivi un cours ou une formation qui abordait le sujet de la nutriginétique?

- (1) Oui
- (2) non

47. Comment percevez-vous votre niveau de connaissances en nutriginétique?

- (1) Très faible
- (2) Faible
- (3) Moyen
- (4) Bon
- (5) Excellent

**Supplementary Table 2. Correlation Matrix of the TBP Constructs.**

|                            | <b>Intention</b><br>(n=140)             | <b>Attitude</b><br>(n=138)              | <b>Subjective norm</b><br>(n=141)          | <b>Behavioural control</b><br>(n=138) |
|----------------------------|-----------------------------------------|-----------------------------------------|--------------------------------------------|---------------------------------------|
| <b>Intention</b>           | -                                       |                                         |                                            |                                       |
| <b>Attitude</b>            | 0.74 (<0.0001 <sup>1</sup> )<br>(n=137) | -                                       |                                            |                                       |
| <b>Subjective norm</b>     | 0.62 (<0.0001 <sup>1</sup> )<br>(n=140) | 0.65 (<0.0001 <sup>1</sup> )<br>(n=138) | -                                          |                                       |
| <b>Behavioural control</b> | 0.64 (<0.0001 <sup>1</sup> )<br>(n=138) | 0.58 (<0.0001 <sup>1</sup> )<br>(n=136) | 0.52<br>(<0.0001 <sup>1</sup> )<br>(n=138) | -                                     |

TPB: Theory of planned behaviour

<sup>1</sup>P-values were determined using Pearson correlations.
